# Supplementary material for: Mixture effect assessment applying in vitro bioassays to in-tissue silicone extracts of traditional foods prepared from beluga whale blubber
Source: Royal Society of Chemistry journal article supplement (doi:10.1039/d3em00076a), 2023-01-01
Supplement: d3em00076a2.xlsx [file d3em00076a2.xlsx]

## Sheet: Table S1
Table S1. Sample ID lipid uptake into PDMS and lipid uptake-adjusted distribution ratio between lipids and PDMS
								Klip/PDMS (gPDMS/glipid)
								37
			sample code	# PDMS	total weight (g) of PDMS before equlibration	total weight (g) of PDMS after equlibration	weight Gain (%)	Dlip/PDMS,coextracted lipid (gPDMS+coextracted lipid/glipid)
HI-14-11 (age 24)	Muktuk	Air Dry	HI-14-11 Muktuk Air Dry	25	2.4193	2.4567	0.015459	23.5371
		Hang Dry	HI-14-11 Muktuk Hang Dry	10	1.0094	1.0251	0.0155538	23.4848
		Boil Drum	HI-14-11 Muktuk Boil Large Drum	25	2.4441	2.5034	0.0242625	19.4972
		Boil Pot	HI-14-11 Muktuk Boil Pot	10	0.9748	0.9887	0.0142593	24.2211
		Roast	HI-14-11 Muktuk Roast	25	2.4476	2.5156	0.0277823	18.2451
		Age 2 d	HI-14-11 Muktuk Age 2 Days	10	0.9821	1.0021	0.0203645	21.1008
		Age 5 d	HI-14-11 Muktuk Age 5 Days	24	2.264	2.325	0.0269435	18.5286
	Uqsuq	Baseline	HI-14-11 Uqsuq Baseline	10	0.9421	0.9592	0.0181509	22.1347
		Age 2 d	HI-14-11 Uqsuq Age 2 Days	10	0.9995	1.0234	0.023912	19.6313
		Age 5 d	HI-14-11 Uqsuq Age 5 Days	25	2.4042	2.4564	0.021712	20.5174
		Oil	HI-14-06 Uqsuq Oil	25	2.4211	2.4489	0.0114824	25.9677
HI-14-06 (age 37)	Muktuk	Air Dry	HI-14-06 Muktuk Air Dry	25	2.4165	2.4861	0.028802	17.9118
		Hang Dry	HI-14-06 Muktuk Hang Dry	10	0.9647	0.9784	0.0142013	24.2552
		Boil Drum	HI-14-06 Muktuk Boil Large Drum	10	2.4553	2.5181	0.0255773	19.0098
		Boil Pot	HI-14-06 Muktuk Boil Pot	10	1.0124	1.0282	0.0156065	23.4557
		Roast	HI-14-06 Muktuk Roast	25	2.4176	2.4754	0.023908	19.6329
		Age 2 d	HI-14-06 Muktuk Age 2 Days	10	0.9896	1.017	0.027688	18.2765
		Age 5 d	HI-14-06 Muktuk Age 5 Days	25	2.4432	2.5138	0.0288965	17.8816
	Uqsuq	Baseline	HI-14-06 Uqsuq Baseline	10	0.9467	0.9551	0.00887293	27.8552
		Age 2 d	HI-14-06 Uqsuq Age 2 Days	10	0.9938	1.0067	0.0129805	24.9953
		Age 5 d	HI-14-06 Uqsuq Age 5 Days	24	2.293	2.3415	0.0211513	20.7562
		Oil	HI-14-11 Uqsuq Oil	25	2.421	2.449	0.0115655	25.9118

## Sheet: Table S2
Table S2. Blank-corrected, recovery-corrected, and lipid-adjusted concentrations of OCPs (ng/glip) measured in beluga TF samples via direct blubber extraction. Reprinted with permission from Binnington, M.J., Lei, Y.D., Pokiak, L., Pokiak, J., Ostertag, S.K., Loseto, L.L., Chan, H.M., Yeung, L.W.Y., Huang, H. and Wania, F. (2017). Effects of preparation on nutrient and environmental contaminant l…
		HI-14-11											HI-14-06
		Muktuk							Uqsuq				Muktuk							Uqsuq
Chemical	Abbreviation	Air Dry	Hang Dry	Boil Drum	Boil Pot	Roast	Age 2 d	Age 5 d	Baseline	Age 2 d	Age 5 d	Oil	Air Dry	Hang Dry	Boil Drum	Boil Pot	Roast	Age 2 d	Age 5 d	Baseline	Age 2 d	Age 5 d	Oil
Organochlorine pesticides (OCP)
α-hexachlorocyclohexane	α-HCH	16.6	7.3	4.9	8.3	7.6	8.2	9.9	10.2	18.1	16.4	19.5	12.1	12.2	14.9	12.6	11.9	11.4	9.1	12.5	9.5	11.6	10.5
β-hexachlorocyclohexane	β-HCH	11.5	5	2.6	5.5	4.6	5.5	6.9	7	10.8	11.8	12.6	9.3	9.6	10.2	8.4	8.4	9.5	9.8	8.8	8.5	10.2	10.4
γ-hexachlorocyclohexane	γ-HCH	108.7	51.2	36.9	63.4	68.1	62.2	65.8	60.5	78.9	114.3	100.7	106	108.8	121.1	107.5	108.7	99.7	107.7	92.1	79	91.3	83.4
Hexachlorobenzene	HCB	228.3	109.3	111.7	120.7	118.7	130.3	149.8	175.1	240.4	249.2	295	188.3	175.1	193.5	175.8	173.4	169.1	168.6	213.3	203.7	218.9	217.9
trans-Chlordane	trans-Chlordane	7.5	4.7	3.3	6.1	5.4	6.2	5.3	4.9	7.5	8	8	17.1	16	17	14.3	14.1	11.3	13.9	14.3	14.6	13.3	12.5
Oxy-chlordane	Oxy-chlordane	164.2	100.5	102.7	115.5	81.2	151.4	149.7	172.8	169.5	133.4	113	481.2	348.6	299	440.4	413.5	93	161.9	407.6	361.1	468.9	216.2
trans-Nonachlor	trans-Nonachlor	293.8	124.5	97.4	153.1	142.4	157.3	196.7	185.9	282.3	237.5	245.4	478.9	491.8	475.5	423.7	428.6	323.7	352.2	470	465.9	457.3	400.1
Endosulfan	Endosulfan	9.2	3.2	3.3	3.4	3.6	4.2	6.3	5.1	8.3	22.3	6	27.3	21	21.7	19.5	18.6	14.6	11.9	23.4	22.9	20.5	16.7
Endosulfan Sulfate	Endosulfan Sulfate	23.9	12.6	11.5	0.6	6.9	7.6	15.6	1	13.3	15.7	17.5	58	52.6	50.8	55.5	48.3	46.8	55	59.4	63.4	67.9	65.3
o,p’-dichlorodiphenyltrichloroethane	o,p’-DDT	55	25.3	17.5	29.2	17.6	31.9	37.8	39.7	54.5	66.2	82.8	126.8	128.9	207.6	142.1	108.3	117.2	153.6	122.5	121.4	126.2	117.9
p,p’-dichlorodiphenyltrichloroethane	p,p’-DDT	45.8	24.5	14.6	26.9	14.8	31.4	31.1	33.2	45.8	51.5	59	204.3	210.2	116.2	159.7	188.6	176.7	187	181.4	178.4	189.6	170.8
p,p’-dichlorodiphenyldichloroethylene	p,p’-DDE	342.1	172.3	111.3	200.3	217.6	216.2	222.3	244.6	358.4	383.7	477.6	732.7	946.8	991.1	896.5	854.1	829.6	1001.5	996.5	975	1026.8	1000.6
o,p’-dichlorodiphenyl-dichloroethane	o,p’-DDD	9	5.3	3.4	7.8	19.5	6.6	6.1	6.1	9.2	10.4	12.6	20.3	22.5	74	36.1	20.4	17.6	22.7	19.1	18.6	18.9	18
p,p’-dichlorodiphenyl-dichloroethane	p,p’-DDD	51.8	14.8	19.4	17	28.3	18.4	35.1	37.3	51.9	51	55.8	169.8	197.9	148.6	188.6	182	141.7	130	203.7	159.2	174	137.9
Dieldrin	Dieldrin	16.5	7.3	4.2	8.8	7.7	9.6	12.5	7.5	16.3	7.7	4.5	38.7	44.1	40.3	43.9	37.7	31.5	20.2	47.4	41.9	35.8	34
Mirex	Mirex	10.6	5.4	4	6.1	5.4	6.1	7.3	8.5	10.9	11.1	15.9	39.9	35.6	33.7	40.7	33.7	16.7	35.5	44.7	57.4	54.7	56.1
Polycyclic aromatic hydrocarbons (PAH)
Naphthalene	NAP	67.5	55.4	17.3	13.5	38.8	39.1	17.1		15.8	26.2	32.9	2.2	1.8	2.6	0.9	2.1	3	3	0.9	0.9	1	7.2
Acenaphthylene	ACL	35.6	45.7	8.3	4.9	61.8	22.9	9.8	0.6	5.3	7.6	22.3				2.1	3			1.4	1.7	1.1	7.4
Acenaphthene	ACN	4.7	4.6	0.3		4.1	1.7	1.1	0.4	0.8	1.3	4.6	0.8	0.5	0.9	0.2	2.7	0.3
Fluorene	FLU	10.9	14.5	3.3	1.5	17.2	6.8	2.4	0.1	1.7	2.5	12.5	0.1	0.5	0.5	0.4	1.2	0.3					2.7
Anthracene	ANT	24.8	28.7	3.5	1.8	61	10.5	4.8		3.1	6	41.4	0.3	0.8	0.7	2.5	5.5	1.8	1.1	0.5	0.3	0.7	6.7
Phenanthrene	PHE	20.8	32.6	4.4	1.9	18.4	12.1	3.5		2.1	5	34.7	0.2	0.6	0.5	2	4.6	1.8	1	0.6	1	0.8	7.1
Pyrene	PYR	1.2	2	0.6	1.6	21.1	0.6	1	0.5	0.6	1.6	3.4				0.4	1.2	0.6			0.1		0.3
Fluoranthene	FLA	1.1	1.2	1.3	1.4	23.9	1	1.1	0.7	0.5	2.9	2.8				0.8	0.9	1.8	0.1	0.3	0.4	0.3	1.1
Chrysene	CHR	0.4	0.1	0.1	0.1	10.1	0.3	0.1	0.2	0.3		0.5	2.7	0.1	0.4	0.1	0.6	0.2
Benzo(a)pyrene	BaP	0.1	0.3	2	0.3	7.1		0.1		0.3	1.5	0.5	0.1				0.7	1.9
Indeno(1,2,3-c,d)pyrene	IP	0.2	0.6	1.6	0.5	1.7	0.4	0.2	0.3	0.7		0.3								0.9	0.3	0.4	0.3
Polychlorinated biphenyls (PCB)
PCB 28	PCB 28	6	5.5	5.6	6	5.9	6.1	6.8	7.4	6.4	5.9	6.1	3.1	3.1	3.1	3	2.9	3.3	3.6	3.7	3.9	3.9	3.8
PCB 44	PCB 44	13.2	12	13.9	12.4	12	12.3	14.2	15.5	14.4	13	13.2	25.3	23.9	25.5	24	21.8	20.7	21.7	25.7	25.3	26.3	26.6
PCB 52	PCB 52	51.6	47.6	58	51.8	52.9	53.8	59.2	63.6	56.9	58	98.5	134.2	134.8	138.7	132.3	126.3	119.4	231.5	271.3	274.5	286.2	278.4
PCB 99	PCB 99	46.7	39.3	46.4	46	45	45.3	49.5	55.6	50.5	46.2	48.9	136.6	137.9	145	124.1	124	111.6	113.8	151.1	148.7	156.5	148.9
PCB 101	PCB 101	54.7	46.6	61.6	54.4	52.3	53.4	58.8	71.3	59.4	67.1	91.9	161.6	161.5	172.8	145.8	142.7	146.8	218.3	290.3	293.9	309.6	306.9
PCB 118	PCB 118	41.2	34.9	37.1	42.8	40.4	37.3	44.1	55.8	46.7	42.8	46.2	134.4	127.1	138.7	116.9	110.9	97.4	101.4	143.1	142.1	154.4	156.1
PCB 138	PCB 138	106.8	94	97.4	102.4	101.5	108.1	119.3	142.5	117.3	115.5	124	370.2	370.6	385.6	344.3	330.2	325.8	321.2	456.9	471.8	488.2	487.4
PCB 153	PCB 153	95.3	80.3	90.4	90.7	95.7	96.1	97	116.1	99.6	99.7	107.9	340.9	336.8	343.8	309	306.9	304.5	301.3	389.5	382.4	408.6	404.1
PCB 180	PCB 180	20.3	19.8	17.9	18.7	18.4	19.9	23.1	26.7	22.2	11.8	25	101.1	99.1	104.9	94.5	90.4	6.4	74.1	115.8	119.2	120.5	121.1
Polybrominated diphenyl ethers (PBDE)
PBDE 28	PBDE 28	0.28	0.27	0.29	0.31	0.3	0.3	0.35	0.34	0.31	0.46	0.41	0.21	0.1	0.19	0.15	0.15	0.28	0.12	0.18	0.14	0.13	0.18
PBDE 47	PBDE 47	4.84	4.6	4.75	5.17	5.11	5.25	5.68	6.89	5.52	4.97	7.22	13.65	13.1	13.57	12.52	11.62	10.74	10.97	14.9	15.01	15.49	15.45
PBDE99	PBDE99	0.55	0.55	0.58	0.54	0.5	0.55	0.58	0.81	0.6	0.87	0.77	1.68	1.9	1.87	1.67	1.6	1.39	1.55	2.16	2.3	2.41	2.3
PBDE100	PBDE100	0.41	0.43	0.43	0.48	0.41	0.45	0.63	0.75	0.59	0.38	0.69	1.67	1.67	1.6	1.5	1.52	1.3	1.48	1.86	1.93	2.17	1.86
PBDE153	PBDE153	0.09	0.07	0.03	0.12	0.1	0.05	0.1	0.2	0.11	0.19	0.16	0.2	0.21	0.25	0.24	0.21	0.25	0.21	0.28	0.33	0.34	0.35
PBDE154	PBDE154	0.24	0.19	0.11	0.18	0.14	0.16	0.26	0.4	0.28	0.06	0.34	0.8	0.8	0.81	0.88	0.75	0.72	0.24	0.72	1.24	1.29	1.31
PBDE209	PBDE209	0.43	0.87	0.73	0.83	0.91	0.76	0.58	0.49	0.89	1.86	0.81						1.58					0.68

## Sheet: Table S3
Table S3. Cytotoxicity expressed as inhibitory concentration for 10% reduction of cell viability IC10 (kgPDMS/Lbioassay) and toxic units TU (Lbioassay/kglipid) for all cell lines.
				AHR		PPAR		ER		AR		PR		GR		AREC32
			sample code	logIC10 (kgPDMS/Lbioassay)	±	logIC10 (kgPDMS/Lbioassay)	±	logIC10 (kgPDMS/Lbioassay)	±	logIC10 (kgPDMS/Lbioassay)	±	logIC10 (kgPDMS/Lbioassay)	±	logIC10 (kgPDMS/Lbioassay)	±	logIC10 (kgPDMS/Lbioassay)	±
HI-14-11	Muktuk	Air Dry	HI-14-11 Muktuk Air Dry	-1.107	0.07772	-1.179	0.04089	-1.162	0.03749	-1.106	0.05298	-1.19	0.02764	-1.141	0.03118	> -1
		Hang Dry	HI-14-11 Muktuk Hang Dry	-1.235	0.04602	-1.45	0.07525	-1.569	0.1796	-1.564	0.05435	-1.349	0.07064	-1.556	0.1525	-1.133	0.1732
		Boil Drum	HI-14-11 Muktuk Boil Large Drum	-1.05	0.02617	-1.234	0.07663	-1.33	0.1245	-1.286	0.1009	-1.443	0.1113	-1.467	0.1111	> -1
		Boil Pot	HI-14-11 Muktuk Boil Pot	-1.287	0.0438	-1.533	0.05153	-1.61	0.09569	-1.351	0.15	-1.835	0.09938	-1.642	0.1392	> -1
		Roast	HI-14-11 Muktuk Roast	-1.322	0.03145	-1.387	0.1125	-1.649	0.1668	-1.21	0.08417	-1.462	0.05322	-1.359	0.05186	> -1
		Age 2 d	HI-14-11 Muktuk Age 2 Days	-1.231	0.08491	-1.426	0.04514	-1.464	0.1331	-1.456	0.1331	-1.672	0.09628	-1.697	0.1394	-1.06	0.1521
		Age 5 d	HI-14-11 Muktuk Age 5 Days	-1.594	0.05954	-1.418	0.04776	-2.141	0.07001	-1.737	0.07263	-1.9	0.09018	-1.807	0.06808	-0.7781	1.563
	Uqsuq	Baseline	HI-14-11 Uqsuq Baseline	-1.334	0.02876	-1.444	0.0695	-1.497	0.1043	-1.363	0.08929	-1.786	0.08057	-1.745	0.06101	-1.228	0.1304
		Age 2 d	HI-14-11 Uqsuq Age 2 Days	-1.33	0.04357	-1.433	0.05912	-1.822	0.1212	-1.595	0.06067	-1.635	0.09424	-1.922	0.1969	-1.152	0.1598
		Age 5 d	HI-14-11 Uqsuq Age 5 Days	-1.22	0.03822	-1.418	0.04776	-1.619	0.1068	-1.305	0.1332	-1.611	0.07705	-1.742	0.07665	> -1
		Oil	HI-14-06 Uqsuq Oil	-1.325	0.02351	-1.422	0.04624	-1.58	0.06859	-1.384	0.1271	-1.677	0.1005	-1.852	0.1052	-1.095	0.1891
HI-14-06	Muktuk	Air Dry	HI-14-06 Muktuk Air Dry	-1.063	0.02232	-1.219	0.07643	-1.327	0.03854	-1.354	0.05732	-1.327	0.05311	-1.305	0.03959	> -1
		Hang Dry	HI-14-06 Muktuk Hang Dry	-1.326	0.05342	-1.509	0.08202	-1.701	0.1157	-1.464	0.0902	-1.722	0.1136	-1.839	0.07855	-1.188	0.1112
		Boil Drum	HI-14-06 Muktuk Boil Large Drum	-1.088	0.02922	-1.223	0.08769	-1.15	0.1055	-1.297	0.1465	-1.401	0.09779	-1.33	0.1027	> -1
		Boil Pot	HI-14-06 Muktuk Boil Pot	-1.197	0.03671	-1.441	0.05692	-1.82	0.1027	-1.366	0.08665	-2.021	0.1445	-1.708	0.1381	> -1
		Roast	HI-14-06 Muktuk Roast	> -1		> -1		> -1		-1.136	0.1478	> -1		> -1		> -1
		Age 2 d	HI-14-06 Muktuk Age 2 Days	-1.13	0.05384	-1.24	0.05419	-1.557	0.1497	-1.402	0.1333	-1.499	0.07532	-1.283	0.07558	> -1
		Age 5 d	HI-14-06 Muktuk Age 5 Days	-1.047	0.03155	-1.137	0.2081	-1.428	0.108	-1.394	0.07282	-1.501	0.1034	-1.609	0.0837	-0.967	0.5805
	Uqsuq	Baseline	HI-14-06 Uqsuq Baseline	-1.131	0.05182	-1.257	0.07416	-1.349	0.08252	-1.267	0.09667	-1.414	0.09485	-1.504	0.1113	-1.139	0.1962
		Age 2 d	HI-14-06 Uqsuq Age 2 Days	-1.332	0.04199	-1.439	0.07896	-1.771	0.1391	-1.498	0.09728	-1.847	0.156	-1.732	0.0857	> -1
		Age 5 d	HI-14-06 Uqsuq Age 5 Days	-1.27	0.05514	-1.18	0.106	-1.397	0.1572	-1.413	0.1059	-1.379	0.1188	-1.523	0.08115	> -1
		Oil	HI-14-11 Uqsuq Oil	-1.104	0.06151	> -1		> -1		> -1		> -1		> -1		-1.04	0.101
		PDMS control	Blank PDMS	> -1		> -1		> -1		> -1		> -1		> -1		> -1
				AHR		PPAR		ER		AR		PR		GR		AREC32			mean (AREc32 not included)
			sample code	logTUbio (Lbioassay/kglipid)	±	logTUbio (Lbioassay/kglipid)	±	logTUbio (Lbioassay/kglipid)	±	logTUbio (Lbioassay/kglipid)	±	logTUbio (Lbioassay/kglipid)	±	logTUbio (Lbioassay/kglipid)	±	logTUbio (Lbioassay/kglipid)	±		logTU	±	CV
HI-14-11	Muktuk	Air Dry	HI-14-11 Muktuk Air Dry	2.53375	0.03749	2.47775	0.05298	2.56175	0.02764	2.51275	0.03118	2.47875	0.07772	2.55075	0.04089	<2.3			2.51925	0.0358148	0.0142164
		Hang Dry	HI-14-11 Muktuk Hang Dry	2.93979	0.1796	2.93479	0.05435	2.71979	0.07064	2.92679	0.1525	2.60579	0.04602	2.82079	0.07525	2.50379	0.1732		2.82462	0.137645	0.0487305
		Boil Drum	HI-14-11 Muktuk Boil Large Drum	2.61997	0.1245	2.57597	0.1009	2.73297	0.1113	2.75697	0.1111	2.33997	0.02617	2.52397	0.07663	<2.3			2.59164	0.152495	0.0588411
		Boil Pot	HI-14-11 Muktuk Boil Pot	2.99419	0.09569	2.73519	0.15	3.21919	0.09938	3.02619	0.1392	2.67119	0.0438	2.91719	0.05153	<2.3			2.92719	0.201024	0.0686748
		Roast	HI-14-11 Muktuk Roast	2.91015	0.1668	2.47115	0.08417	2.72315	0.05322	2.62015	0.05186	2.58315	0.03145	2.64815	0.1125	<2.3			2.65931	0.148229	0.0557395
		Age 2 d	HI-14-11 Muktuk Age 2 Days	2.7883	0.1331	2.7803	0.1331	2.9963	0.09628	3.0213	0.1394	2.5553	0.08491	2.7503	0.04514	2.3843	0.1521		2.8153	0.172613	0.0613124
		Age 5 d	HI-14-11 Muktuk Age 5 Days	3.40884	0.07001	3.00484	0.07263	3.16784	0.09018	3.07484	0.06808	2.86184	0.05954	2.68584	0.04776	<2.3			3.03401	0.249716	0.0823056
	Uqsuq	Baseline	HI-14-11 Uqsuq Baseline	2.84207	0.1043	2.70807	0.08929	3.13107	0.08057	3.09007	0.06101	2.67907	0.02876	2.78907	0.0695	2.57307	0.1304		2.87324	0.193148	0.0672231
		Age 2 d	HI-14-11 Uqsuq Age 2 Days	3.11495	0.1212	2.88795	0.06067	2.92795	0.09424	3.21495	0.1969	2.62295	0.04357	2.72595	0.05912	2.44495	0.1598		2.91578	0.224445	0.0769761
		Age 5 d	HI-14-11 Uqsuq Age 5 Days	2.93112	0.1068	2.61712	0.1332	2.92312	0.07705	3.05412	0.07665	2.53212	0.03822	2.73012	0.04776	<2.3			2.79796	0.203465	0.0727193
		Oil	HI-14-06 Uqsuq Oil	2.99443	0.06859	2.79843	0.1271	3.09143	0.1005	3.26643	0.1052	2.73943	0.02351	2.83643	0.04624	2.50943	0.1891		2.95443	0.201096	0.0680658
HI-14-06	Muktuk	Air Dry	HI-14-06 Muktuk Air Dry	2.58014	0.03854	2.60714	0.05732	2.58014	0.05311	2.55814	0.03959	2.31614	0.02232	2.47214	0.07643	<2.3			2.51897	0.109658	0.043533
		Hang Dry	HI-14-06 Muktuk Hang Dry	3.0858	0.1157	2.8488	0.0902	3.1068	0.1136	3.2238	0.07855	2.7108	0.05342	2.8938	0.08202	2.5728	0.1112		2.9783	0.191732	0.0643762
		Boil Drum	HI-14-06 Muktuk Boil Large Drum	2.42898	0.1055	2.57598	0.1465	2.67998	0.09779	2.60898	0.1027	2.36698	0.02922	2.50198	0.08769	<2.3			2.52715	0.11693	0.0462695
		Boil Pot	HI-14-06 Muktuk Boil Pot	3.19025	0.1027	2.73625	0.08665	3.39125	0.1445	3.07825	0.1381	2.56725	0.03671	2.81125	0.05692	<2.3			2.96242	0.309639	0.104523
		Roast	HI-14-06 Muktuk Roast	<2.3		2.42898	0.1478	<2.3		<2.3		<2.3		<2.3		<2.3			<2.3
		Age 2 d	HI-14-06 Muktuk Age 2 Days	2.81889	0.1497	2.66389	0.1333	2.76089	0.07532	2.54489	0.07558	2.39189	0.05384	2.50189	0.05419	<2.3			2.61373	0.162925	0.0623344
		Age 5 d	HI-14-06 Muktuk Age 5 Days	2.68041	0.108	2.64641	0.07282	2.75341	0.1034	2.86141	0.0837	2.29941	0.03155	2.38941	0.2081	<2.3			2.60507	0.216812	0.0832269
	Uqsuq	Baseline	HI-14-06 Uqsuq Baseline	2.79391	0.08252	2.71191	0.09667	2.85891	0.09485	2.94891	0.1113	2.57591	0.05182	2.70191	0.07416	2.58391	0.1962		2.76524	0.131173	0.0474363
		Age 2 d	HI-14-06 Uqsuq Age 2 Days	3.16886	0.1391	2.89586	0.09728	3.24486	0.156	3.12986	0.0857	2.72986	0.04199	2.83686	0.07896	<2.3			3.00103	0.207732	0.0692203
		Age 5 d	HI-14-06 Uqsuq Age 5 Days	2.71415	0.1572	2.73015	0.1059	2.69615	0.1188	2.84015	0.08115	2.58715	0.05514	2.49715	0.106	<2.3			2.67748	0.119672	0.0446959
		Oil	HI-14-11 Uqsuq Oil	<2.3		<2.3		<2.3		<2.3		<2.3		<2.3		2.4535	0.101		<2.3
		PDMS control	Blank PDMS	<2.3		<2.3		<2.3		<2.3		<2.3		<2.3		<2.3			<2.3

## Sheet: Table S4
Table S4. Effect concentrations EC10 (kgPDMS/Lbioassay) converted to EC10 (mglipid/Lbioassay)
				logDlip/PDMS,coextracted lipid	AhR-CALUX				PPARɣ-bla			AR-bla			AREc32
			sample code		EC10 (gPDMS/Lbioassay)	lower 95% CL	upper 95% CL	EC10 (mglipid/Lbioassay)	EC10 (gPDMS/Lbioassay)	±	EC10 (mglipid/Lbioassay)	EC10 (gPDMS/Lbioassay)	±	EC10 (mglipid/Lbioassay)	ECIR1.5 (gPDMS/Lbioassay)	±	ECIR1.5 (mglipid/Lbioassay)
HI-14-11	Muktuk	Air Dry	HI-14-11 Muktuk Air Dry	1.37175	73.9605	71.7794	76.3836	3142.29	2.36798	0.0959979	100.606	26.8097	1.84146	1139.04	11.0132	0.68117	467.908
		Hang Dry	HI-14-11 Muktuk Hang Dry	1.37079	54.2001	52.6017	55.7186	2307.88	2.16967	0.156005	92.3862	>78	cytotoxicity		7.07914	0.428577	301.436
		Boil Drum	HI-14-11 Muktuk Boil Large Drum	1.28997	83.946	80.7235	86.896	4305.55	2.70929	0.106214	138.958	>27	cytotoxicity		8.28775	0.648129	425.075
		Boil Pot	HI-14-11 Muktuk Boil Pot	1.38419	51.9996	50.0035	54.2001	2146.87	1.9685	0.0661076	81.2724	>52	cytotoxicity		6.27353	0.423561	259.011
		Roast	HI-14-11 Muktuk Roast	1.26115	25.3513	22.856	27.7971	1389.49	3.0303	0.120018	166.089	>45	cytotoxicity		6.80087	0.400078	372.751
		Age 2 d	HI-14-11 Muktuk Age 2 Days	1.3243	56.3638	53.7032	58.8844	2671.17	1.72117	0.0670694	81.5689	>62	cytotoxicity		7.83945	0.462279	371.524
		Age 5 d	HI-14-11 Muktuk Age 5 Days	1.26784	21.0863	20.2302	21.928	1138.04	1.56128	0.0664489	84.2631	>35	cytotoxicity		2.39923	0.188116	129.488
	Uqsuq	Baseline	HI-14-11 Uqsuq Baseline	1.34507	48.6407	47.0977	50.2343	2197.49	1.42328	0.0475644	64.3011	>18	cytotoxicity		5.49451	0.21501	248.231
		Age 2 d	HI-14-11 Uqsuq Age 2 Days	1.29295	49.4311	45.4988	53.4564	2517.97	1.29282	0.0613737	65.8552	>43	cytotoxicity		5.79979	0.310475	295.435
		Age 5 d	HI-14-11 Uqsuq Age 5 Days	1.31212	42.2669	40.2717	44.157	2060.05	1.56128	0.0664489	76.0953	>25	cytotoxicity		6.24844	0.380825	304.543
		Oil	HI-14-06 Uqsuq Oil	1.41443	42.9536	41.4	44.4631	1654.12	1.16212	0.0493072	44.7524	>50	cytotoxicity		6.08717	0.25982	234.413
HI-14-06	Muktuk	Air Dry	HI-14-06 Muktuk Air Dry	1.25314	77.2681	74.6449	79.6159	4313.8	2.07469	0.102658	115.828	15.0761	1.35147	841.686	12.0424	0.522939	672.315
		Hang Dry	HI-14-06 Muktuk Hang Dry	1.3848	40.9261	35.8096	45.8142	1687.31	1.514	0.0549213	62.4199	>44	cytotoxicity		6.09236	0.365453	251.178
		Boil Drum	HI-14-06 Muktuk Boil Large Drum	1.27898	85.7038	81.2831	90.1571	4508.39	3.24675	0.172774	170.793	>34	cytotoxicity		7.04225	0.38415	370.453
		Boil Pot	HI-14-06 Muktuk Boil Pot	1.37025	63.9735	61.235	66.5273	2727.41	2.07211	0.0950611	88.3413	>50	cytotoxicity		5.84727	0.311613	249.29
		Roast	HI-14-06 Muktuk Roast	1.29298	72.277	68.5488	75.8578	3681.43	3.92465	0.165889	199.902	52.8821	5.17914	2693.55	21.6076	1.50618	1100.58
		Age 2 d	HI-14-06 Muktuk Age 2 Days	1.26189	55.2077	53.5797	56.8853	3020.69	1.91755	0.0750104	104.918	>73	cytotoxicity		6.78058	0.268501	370.999
		Age 5 d	HI-14-06 Muktuk Age 5 Days	1.25241	65.3131	61.8016	68.7068	3652.54	1.70707	0.0620699	95.4653	>40	cytotoxicity		8.87154	0.643801	496.128
	Uqsuq	Baseline	HI-14-06 Uqsuq Baseline	1.44491	61.8016	58.479	67.1429	2218.68	1.75716	0.0596836	63.082	>40	cytotoxicity		7.3888	0.376046	265.258
		Age 2 d	HI-14-06 Uqsuq Age 2 Days	1.39786	53.2108	45.1856	60.9537	2128.83	1.52486	0.0769636	61.0057	>54	cytotoxicity		5.93613	0.461472	237.49
		Age 5 d	HI-14-06 Uqsuq Age 5 Days	1.31715	39.7192	38.7258	40.6443	1913.6	1.32644	0.0786114	63.9055	20.429	0.85806	984.236	5.82479	0.49603	280.629
		Oil	HI-14-11 Uqsuq Oil	1.4135	76.5597	70.7946	96.1612	2954.63	5.12295	0.412303	197.707	19.7044	1.22886	760.443	69.0226	5.07379	2663.76
			Blank PDMS		>100				>100			>100			>100

## Sheet: Table S5
Table S5. Concentrations of OCPs and PCBs in lipid (ng/glip) calculated from PDMS concentrations and Klip/PDMS from literature (A. Jahnke, M. S. McLachlan and P. Mayer, Equilibrium sampling: Partitioning of organochlorine compounds from lipids into polydimethylsiloxane, Chemosphere, 2008, 73, 1575-1581.)
HI-14-11	Muktuk								Uqsuq					HI-14-06	Muktuk							Uqsuq
	Klip/PDMS	Air Dry	Hang Dry	Boil Drum	Boil Pot	Roast	Age 2 d	Age 5 d	Baseline	Age 2 d	Age 5 d	Oil			Air Dry	Hang Dry	Boil Drum	Boil Pot	Roast	Age 2 d	Age 5 d	Baseline	Age 2 d	Age 5 d	Oil
HCB	15.2	363.054	346.6	377.009	409.725	437.598	748.559	434.684	440.217	490.332	570.306	505.779		HCB	440.575	570.838	958.463	848.071	161.319	480.354	564.717	1084.6	715.587	749.513	905.877
o,p’-DDT	19.9	68.9856	24.423	19.052	0.131264	24.906	6.77003	22.4512	23.5868	31.6942	17.5049	11.5101		o,p’-DDT	60.8585	165.188	72.4166	106.474	233.61	70.6879	187.359	104.633	73.7496	157.02	275.225
p,p’-DDT	45.2	388.968	75.4007	54.757	100.027	69.8668	167.558	70.69	73.4749	75.3951	79.6679	148.85		p,p’-DDT	617.397	673.924	468.429	641.739	622.038	656.081	552.393	579.712	526.796	639.381	582.046
PCB 28	18.6	5.90425	4.85357	4.9021	5.10321	4.92551	5.46717	2.62833	4.35851	4.40508	4.31837	5.55461		PCB 28	3.04103	2.78853	2.76399	3.2952	3.30915	2.91419	4.75908	4.37173	5.92658	6.66791	4.36212
PCB 44	16.9	19.7306	10.1327	9.95389	10.9981	10.4185	15.8182	6.0568	11.0583	11.9519	11.2144	13.407		PCB 44	21.1816	23.3575	25.607	23.331	23.8442	26.1304	26.8337	31.8039	30.2459	34.9227	31.6222
PCB 52	18.5	54.2169	40.501	39.6317	47.5317	44.0878	59.9626	25.0928	43.4	44.5748	46.6797	51.6041		PCB 52	107.488	123.36	134.623	127.397	126.035	134.213	132.648	149.099	146.675	168.005	157.661
PCB 99	25.2	71.0845	40.769	44.255	46.8758	49.7702	61.9851	26.1584	48.3188	47.6059	45.516	53.6291		PCB 99	142.738	162.48	163.3	156.627	157.687	167.918	165.959	185.75	180.004	205.352	195.189
PCB 101	25.1	113.493	45.157	47.9636	53.924	52.2052	70.5385	29.7104	57.4493	55.9465	55.7404	64.1547		PCB 101	144.998	175.567	180.604	168.429	161.558	177.47	179.586	238.041	215.153	252.272	243.321
PCB 118	33.7	120.625	35.027	33.2327	41.2068	45.2339	42.6633	22.6145	46.3979	40.2812	36.8112	53.4898		PCB 118	137.073	148.255	139.35	139.323	129.974	147.805	165.855	237.832	184.196	219.749	208.14
PCB 138	32.7	169.321	104.3	106.235	115.528	113.539	142.518	66.5195	117.478	116.463	125.239	136.803		PCB 138	386.398	442.669	424.339	404.778	426.886	461.054	485.807	580.986	562.883	624.283	606.958
PCB 153	36.1	177.835	107.481	113.314	123.227	113.724	149.619	68.2572	119.281	112.225	122.386	136.696		PCB 153	449.039	483.534	477.854	483.637	487.278	505.32	517.694	567.199	578.47	647.017	624.503

## Sheet: Table S6
Table S6 -Effect concentrations of detected chemicals
Data from J. Lee, G. Braun, L. Henneberger, M. König, R. Schlichting, S. Scholz and B. I. Escher, Critical Membrane Concentration and Mass-Balance Model to Identify Baseline Cytotoxicity of Hydrophobic and Ionizable Organic Chemicals in Mammalian Cell Lines, Chem. Res. Toxicol., 2021, 34, 2100-2109.
Chemical	AhR cytotoxcity IC10 (M)	SE	AhR EC10 (M)	SE	Source	PPARγ cytotoxcity IC10 (M)	SE	PPARγ EC10 (M)	SE	Source	ARE cytotoxcity IC10 (M)	SE	ARE ECIR1.5 (M)	SE	Source
α-HCH
β-HCH
γ-HCH
HCB			6.60001e-05	4.6178e-06	this study								0.000131096	6.56167e-06	this study
trans-Chlordane
Oxy-chlordane
trans-Nonachlor
Endosulfan											7.13498e-05	1.058e-05	3.552e-05	8.03791e-06	Tox21
Endosulfan Sulfate	Precipitation				Lee et al. 2021	8.1479e-05	8.57405e-06	no effect		Lee et al. 2021	3.5918e-05	2.47932e-06	masked		Lee et al. 2021
o,p’-DDT			Precipitation
p,p’-DDT	1.81432e-05	1.51388e-06	masked		Lee et al. 2021	1.0396e-05	2.16166e-06	no effect		Lee et al. 2021	1.79518e-05	1.38385e-06	masked		Lee et al. 2021
p,p’-DDE	2.35715e-05	3.31364e-06	not active		Lee et al. 2021	3.84048e-05	1.58713e-05	no effect		Lee et al. 2021	2.60496e-05	1.83611e-06	masked		Lee et al. 2021
o,p’-DDD
p,p’-DDD	3.30308e-05	2.87956e-06	masked		Lee et al. 2021	1.43056e-05	1.95228e-06	not active		Lee et al. 2021	3.80376e-05	5.03303e-06	masked		Lee et al. 2021
Dieldrin	no cytotoxicity		not active		Lee et al. 2021	5.37377e-05	5.58518e-06	not active		Lee et al. 2021	Precipitation		Precipitation		Lee et al. 2021
Mirex	2.59141e-05	1.90663e-06	masked		Lee et al. 2021	no cytotoxicity		not active		Lee et al. 2021	2.48196e-05	2.38587e-06	not active		Lee et al. 2021
NAP
ACL
ACN
FLU
ANT	4.43634e-05	1.06369e-05	5.34354e-06	2.55673e-07	Lee et al. 2021	7.1929e-05	2.08281e-05	not active		Lee et al. 2021	0.000140068	6.21039e-05	4.78423e-05	1.9982e-06	Lee et al. 2021
PHE	5.92417e-05	5.24507e-06	1.10151e-05	3.66124e-07	Lee et al. 2021	no cytotoxicity		0.000265597	0.000356822	Lee et al. 2021	0.000106703	7.36076e-06	masked		Lee et al. 2021
PYR	5.35822e-05	1.13832e-05	4.39903e-06	2.67933e-07	Lee et al. 2021	no cytotoxicity		not active		Lee et al. 2021	Precipitation		Precipitation		Lee et al. 2021
FLA	Precipitation		3.01144e-06	1.46505e-07	Lee et al. 2021	no cytotoxicity		1.60263e-05	1.19794e-06	Lee et al. 2021	Precipitation		8.30703e-05	3.67944e-06	Lee et al. 2021
CHR	1.48685e-05	1.4426e-06	6.29423e-09	6.00913e-10	Lee et al. 2021	no cytotoxicity		not active		Lee et al. 2021	3.67274e-05	8.50107e-06	2.80238e-07	9.74098e-09	Lee et al. 2021
BaP	8.3763e-06	9.28712e-07	3.81327e-09	2.35719e-10	Lee et al. 2021	2.64255e-05	2.41733e-06	no effect		Lee et al. 2021	no cytotoxicity		1.65017e-07	5.99405e-09	Lee et al. 2021
IP
PCB 28	3.72435e-05	3.56383e-06	masked		Lee et al. 2021	3.1132e-05	4.57967e-06	1.51617e-05	6.18001e-06	Lee et al. 2021	3.48662e-05	1.98856e-06	masked		Lee et al. 2021
PCB 44
PCB 52	no cytotoxicity		not active		Lee et al. 2021	4.81086e-05	2.0798e-05	not active		Lee et al. 2021	3.45899e-05	3.13759e-06	not active		Lee et al. 2021
PCB 99
PCB 101	2.12673e-05	1.82317e-06	masked		Lee et al. 2021	8.71456e-06	1.52167e-06	not active		Lee et al. 2021	2.34906e-05	2.2686e-06	masked		Lee et al. 2021
PCB 118	1.38051e-05	8.04842e-07	8.9943e-08	4.43777e-09	Lee et al. 2021	1.51446e-05	1.21031e-06	no effect		Lee et al. 2021	2.1297e-05	1.35965e-06	not active		Lee et al. 2021
PCB 138	1.83819e-05	2.80464e-06	5.00937e-07	2.26286e-08	Lee et al. 2021	5.21047e-06	5.36037e-07	no effect		Lee et al. 2021	1.97007e-05	1.40944e-06	not active		Lee et al. 2021
PCB 153	3.7506e-05	5.62399e-06	not active		Lee et al. 2021	5.52261e-06	5.28947e-07	not active		Lee et al. 2021	2.24648e-05	1.5251e-06	not active		Lee et al. 2021
PCB 180	1.32624e-05	1.25431e-06	6.26144e-07	6.94582e-08	Lee et al. 2021	9.97991e-06	2.06322e-06	no effect		Lee et al. 2021	3.12876e-05	3.58998e-06	not active		Lee et al. 2021
PBDE 28	5.38109e-05	9.21789e-06	1.05872e-05	1.28055e-06	Lee et al. 2021	1.47068e-05	2.99015e-06	not active		Lee et al. 2021	4.61263e-05	2.64082e-06	masked		Lee et al. 2021
PBDE 47	2.01929e-05	2.66822e-06	1.33336e-05	1.14533e-06	Lee et al. 2021	9.1307e-06	1.31101e-06	6.63771e-06	6.54297e-07	Lee et al. 2021	2.27694e-05	1.95336e-06	masked		Lee et al. 2021
PBDE99	1.98614e-05	2.03246e-06	2.38895e-06	1.69839e-07	Lee et al. 2021	2.04645e-05	2.44842e-06	no effect		Lee et al. 2021	2.67491e-05	2.60734e-06	masked		Lee et al. 2021
PBDE100	1.41234e-05	8.95624e-07	masked		Lee et al. 2021	9.37113e-06	1.91158e-06	no effect		Lee et al. 2021	1.60005e-05	1.23866e-06	not active		Lee et al. 2021
PBDE153	1.40902e-05	2.75104e-06	8.42365e-07	4.65134e-08	Lee et al. 2021	no cytotoxicity		no effect		Lee et al. 2021	2.24648e-05	1.5251e-06	not active		Lee et al. 2021
PBDE154
PBDE209

## Sheet: Table S7
Table S7. Iceberg modelling: Bioanalytical equivalent concentrations BEQ from bioassay measurements (BEQbio) and predicted BEQchem from the chemical concentrations (Table S2) and their relative effect potencies (calculated from the effect concentrations in Table S6) as well as % effect explained by the detected chemicals.
				AhR-CALUX			PPARɣ-bla			AREc32
			sample code	B[a|P-EQbio (ngB[a|P/glipid)	B[a|P-EQchem (ngB[a|P/glipid)	% activation of AhR explained	rosigiltazone-EQbio (µgrosiglitazone/glipid)	rosigiltazone-EQchem(µgrosiglitazone/glipid)	% activation of PPARɣ explained	B[a|P-EQbio (µgB[a|P/glipid)	B[a|P-EQchem (µgB[a|P/glipid)	% activation of AREc32 explained
HI-14-11	Muktuk	Air Dry	HI-14-11 Muktuk Air Dry	390.72	2.90448	0.00743366	3.06592	1.17716e-06	3.83948e-07	88.9842	0.000765258	8.59994e-06
		Hang Dry	HI-14-11 Muktuk Hang Dry	531.984	2.58926	0.00486717	3.33871	1.2011e-06	3.5975e-07	138.127	0.000639307	4.6284e-06
		Boil Drum	HI-14-11 Muktuk Boil Large Drum	285.157	4.80356	0.0168453	2.21974	1.04912e-06	4.72632e-07	97.9507	0.00221947	2.26591e-05
		Boil Pot	HI-14-11 Muktuk Boil Pot	571.881	2.88589	0.00504631	3.79528	1.11412e-06	2.93554e-07	160.751	0.000521745	3.24566e-06
		Roast	HI-14-11 Muktuk Roast	883.604	20.1678	0.0228245	1.85714	3.34908e-06	1.80335e-06	111.7	0.014173	0.000126884
		Age 2 d	HI-14-11 Muktuk Age 2 Days	459.633	2.52584	0.00549534	3.78148	1.15807e-06	3.06248e-07	112.069	0.000406407	3.62638e-06
		Age 5 d	HI-14-11 Muktuk Age 5 Days	1078.84	2.81999	0.00261392	3.66057	1.20798e-06	3.29997e-07	321.547	0.000376458	1.17077e-06
	Uqsuq	Baseline	HI-14-11 Uqsuq Baseline	558.709	3.38663	0.00606152	4.79698	1.31025e-06	2.73141e-07	167.733	0.000341869	2.03818e-06
		Age 2 d	HI-14-11 Uqsuq Age 2 Days	487.598	3.32156	0.00681209	4.68378	1.09486e-06	2.33755e-07	140.932	0.000803635	5.70228e-06
		Age 5 d	HI-14-11 Uqsuq Age 5 Days	595.985	4.3973	0.00737821	4.05349	1.25003e-06	3.08383e-07	136.718	0.00187865	1.37411e-05
		Oil	HI-14-06 Uqsuq Oil	742.242	3.86702	0.00520992	6.8924	1.66506e-06	2.41579e-07	177.62	0.00138078	7.77378e-06
HI-14-06	Muktuk	Air Dry	HI-14-06 Muktuk Air Dry	284.612	10.5518	0.0370745	2.66301	1.55191e-06	5.82765e-07	61.9299	0.00214729	3.46729e-05
		Hang Dry	HI-14-06 Muktuk Hang Dry	727.64	7.91949	0.0108838	4.94155	1.50191e-06	3.03934e-07	165.765	0.000324765	1.95919e-06
		Boil Drum	HI-14-06 Muktuk Boil Large Drum	272.327	8.74646	0.0321175	1.80599	1.54621e-06	8.56159e-07	112.393	0.000542055	4.82285e-06
		Boil Pot	HI-14-06 Muktuk Boil Pot	450.154	7.33725	0.0162994	3.49159	1.52378e-06	4.36414e-07	167.02	0.000331508	1.98483e-06
		Roast	HI-14-06 Muktuk Roast	333.5	8.32098	0.0249505	1.54301	1.45624e-06	9.43766e-07	37.8312	0.00136654	3.6122e-05
		Age 2 d	HI-14-06 Muktuk Age 2 Days	406.449	8.54722	0.021029	2.93991	1.47106e-06	5.00375e-07	112.228	0.00227406	2.02629e-05
		Age 5 d	HI-14-06 Muktuk Age 5 Days	336.138	6.40206	0.0190459	3.23103	1.34978e-06	4.17754e-07	83.9227	0.000227932	2.71598e-06
	Uqsuq	Baseline	HI-14-06 Uqsuq Baseline	553.374	9.11174	0.0164658	4.88969	1.75004e-06	3.57903e-07	156.966	0.000308479	1.96526e-06
		Age 2 d	HI-14-06 Uqsuq Age 2 Days	576.728	9.19193	0.0159381	5.05611	1.78848e-06	3.53726e-07	175.319	0.000295604	1.68609e-06
		Age 5 d	HI-14-06 Uqsuq Age 5 Days	641.594	9.77629	0.0152375	4.82668	1.82358e-06	3.77812e-07	148.368	0.000307347	2.07152e-06
		Oil	HI-14-11 Uqsuq Oil	415.537	9.85171	0.0237084	1.56	1.92903e-06	1.23656e-06	15.6307	0.000326564	2.08925e-05
